# Supplementary material for: Using First Passage Statistics to Extract Environmentally Dependent Amino Acid Correlations
Source: PLoS One. 2014 Jul 7;9(7):e101665. doi: 10.1371/journal.pone.0101665 (PMC4084998; doi:10.1371/journal.pone.0101665)
Supplement: Table S2 — Range of first-passage statistics for four hundred amino acid pairs. Maximum, minimum and median values are listed for within organism p-values and typical first-passage lengths across the organisms studied. The median values for the ratio of the observed first-passage length to what one would expect from a geometric distribution, and the Spearman correlation are also listed. (XLSX) [file pone.0101665.s002.xlsx]

## Sheet: Table S2
XY									Correlation
	Maximum Value	Minimum Value	Median Value	Median Value	Standard Deviation	Minimum Value	Maximum Value	Ratio of Observed Time to Geometric Time
AA	148.26	101.81	120.58	12.508	2.4833	7.3431	16.474	0.9559	0.2249
AR	163.47	102.27	132.2	18.259	4.165	12.01	28.014	1.0307	-0.2227
AN	165.57	96.789	123.82	24.155	7.3652	16.306	48.468	0.9506	0.226
AD	167.25	110.43	133.29	17.666	1.8618	14.916	24.789	0.9235	0.4642
AC	109.59	35.255	66.888	60.263	10.17	34.926	86.334	0.5674	0.2137
AQ	149.39	65.742	115.42	30.062	8.5635	17.302	50.514	0.8956	0.833
AE	156.26	101.85	120.19	14.848	1.5826	11.791	19.459	1.0554	-0.5288
AG	161.91	105.65	133.1	12.786	1.8256	10.084	18.791	0.9467	-0.3043
AH	136.39	66.854	91.951	43.874	5.733	34.5	54.814	0.826	0.6933
AI	162.24	109.25	137.54	13.63	4.9809	8.2602	29.814	0.9581	-0.234
AL	147.95	104.45	131.35	9.5546	0.99179	6.6822	12.729	1.0319	-0.3268
AK	153.31	99.748	121.08	18.417	6.3255	11.422	38.879	1.0748	-0.2264
AM	146.55	76.66	99.942	39.019	6.0653	29.888	58.689	0.9222	0.2821
AF	161.51	101.87	131.24	22.992	3.2193	17.793	31.827	0.9504	-0.045
AP	159.42	85.693	124.78	21.13	2.8283	14.61	29.673	0.8972	-0.1335
AS	168.99	112.21	137.23	15.419	2.9321	12.14	26.15	0.9862	0.3183
AT	169.36	105.6	135.89	18.496	1.8591	15.592	24.665	0.9374	0.6463
AW	111.1	36.91	71.122	60.208	8.1115	41.705	80.806	0.6737	-0.0367
AY	156.81	96.874	120.51	27.434	5.6004	19.43	42.907	0.9311	-0.5999
AV	177.37	122.14	143.9	12.544	1.633	9.1487	16.715	0.9607	-0.6752
RA	158.6	99.22	127.73	13.516	2.9978	7.6564	18.468	1.0549	0.2123
RR	146.13	90.85	117.42	15.898	3.5453	11.022	24.409	0.8942	-0.2517
RN	168.45	74.875	115.35	23.767	7.8166	15.54	49.035	0.9375	0.2487
RD	150.33	99.864	123.94	16.825	1.829	13.937	22.861	0.8628	0.3538
RC	108.33	24.926	55.011	60.927	11.938	31.294	98.216	0.5725	-0.0204
RQ	140.71	66.801	104.4	29.119	8.8628	16.572	47.395	0.8776	0.8531
RE	130.26	96.716	114.12	13.259	1.5187	10.277	17.43	0.9249	-0.6664
RG	166.5	101.15	131.1	13.594	2.0238	10.146	19.859	0.9954	-0.2624
RH	128.93	56.321	93.41	40.844	6.299	32.297	56.14	0.7782	0.7446
RI	159.79	101.54	130.07	14.059	5.0587	8.0116	30.956	0.9666	-0.2248
RL	151.48	103.1	126.46	9.2748	0.95457	6.8982	12.37	1.0057	-0.3033
RK	145.86	100.18	119.72	17.315	6.6178	10.552	37.11	1.0167	-0.251
RM	132.88	66.124	92.99	40.379	5.7109	29.599	57.587	0.947	0.1886
RF	151.54	98.525	118.57	22.941	3.2371	17.235	31.794	0.951	-0.0116
RP	151.04	88.489	116.4	21.797	3.1715	14.459	30.404	0.9433	-0.1381
RS	156.21	111.46	132.89	15.774	3.1254	12.03	27.338	1.0014	0.3476
RT	175.95	103.16	128.12	19.315	2.113	16.412	25.541	0.9878	0.7109
RW	98.346	33.573	66.677	52.413	7.9069	37.29	79.326	0.6016	-0.1083
RY	136.69	89.271	111.14	25.272	4.9176	18.829	39.694	0.8657	-0.5683
RV	175.11	111.52	139.08	12.906	1.8973	9.1134	17.666	0.9967	-0.6762
NA	168.98	95.106	124.42	13.428	3.1242	8.2139	19.692	1.0706	0.2196
NR	144.53	94.377	116.34	18.099	4.0125	13.177	28.47	1.0147	-0.2396
NN	152.6	59.882	111.74	21.346	5.5771	14.126	38.532	0.8475	0.2509
ND	158.7	91.16	118.83	17.432	1.6749	14.337	22.782	0.8876	0.5069
NC	101.99	15.033	50.061	56.583	9.3806	35.078	83.78	0.5322	-0.0019
NQ	145.49	48.909	97.952	28.858	8.4376	18.343	49.782	0.8627	0.8467
NE	143.56	89.695	117.03	14.696	1.796	10.838	20.514	1.0206	-0.525
NG	147.19	100.91	121.77	13.463	2.323	9.8326	21.116	1.0032	-0.1968
NH	129.29	52.051	78.962	41.515	7.041	33.306	62.475	0.8016	0.6863
NI	151.01	75.336	119.74	13.466	3.7557	8.0991	23.306	0.9332	-0.3163
NL	139.45	22.921	118.07	9.5803	0.93419	6.8763	12.54	1.0415	-0.424
NK	142.79	81.982	113.8	16.713	5.5748	9.6793	35.633	0.9993	-0.2304
NM	129.61	48.35	82.819	40.511	5.6905	30.792	56.375	0.9789	0.3607
NF	142.27	76.988	108.89	21.788	2.4629	16.705	29.059	0.9087	-0.0022
NP	148.19	89.953	107.57	21.768	3.329	15.077	33.466	0.9425	-0.1621
NS	162.29	83.475	123.28	15.249	2.829	11.46	24.483	0.9688	0.3832
NT	169.97	88.642	120.9	18.415	1.7181	15.253	22.007	0.9396	0.7513
NW	87.111	39.675	55.434	53.933	7.8375	40.114	78.063	0.6062	-0.1296
NY	141.71	80.035	109.09	24.831	4.4462	17.651	34.745	0.8452	-0.6532
NV	170.68	93.519	123.91	12.726	1.9389	9.0173	18.202	0.9843	-0.646
DA	180.04	98.497	132.95	13.518	3.1199	8.0621	19.365	1.0587	0.2206
DR	159.77	106.03	127.99	17.309	4.1875	11.476	27.681	0.9633	-0.2708
DN	162.43	69.07	115.55	22.593	7.1879	14.66	45.96	0.8958	0.2222
DD	150.06	90.25	120.61	16.41	1.8634	13.944	23.721	0.8617	0.4792
DC	102.66	17.55	56.55	57.668	12.102	37.344	112.13	0.5705	0.0256
DQ	145.55	48.017	97.395	30.573	9.8788	17.334	54.991	0.9181	0.8512
DE	144.03	106.63	126.64	13.975	1.5614	10.765	18.302	0.9754	-0.6323
DG	154.72	104.05	129.62	13.19	2.1503	9.9123	20	0.9741	-0.283
DH	125.87	66.163	85.186	41.234	5.982	33.36	53.921	0.7836	0.7136
DI	146.74	91.816	126.08	13.473	4.3327	8.2086	25.865	0.9424	-0.2843
DL	150.75	96.847	125.22	9.522	0.89377	7.5091	12.371	1.0435	-0.3567
DK	147.53	91.804	119.95	16.52	6.2766	9.6233	37.435	0.9755	-0.2668
DM	132.58	56.755	93.397	42.688	6.2729	30.623	58.705	1.0065	0.2459
DF	133.06	88.563	111.86	22.364	2.8493	17.375	29.464	0.9306	0
DP	153.8	84.649	116.59	21.285	3.2479	14.754	31.818	0.922	-0.1836
DS	155.95	94.353	130.9	15.641	3.1517	12.157	26.885	1.0021	0.3503
DT	179.5	99.631	127.32	19.21	2.0271	15.572	24.262	0.973	0.7568
DW	92.36	42.175	63.619	56.127	7.5931	40.049	75.966	0.628	-0.0695
DY	126.51	91.95	112.75	25.518	4.6158	18.543	37.405	0.8576	-0.6318
DV	154.67	112.77	131.55	12.655	1.8372	9.143	17.416	0.9705	-0.694
CA	154.43	17.972	87.027	12.757	3.3126	6.4073	19.498	1.055	0.2749
CR	139.42	51.737	89.376	16.422	4.1319	11.859	26.733	0.9265	-0.3239
CN	147.21	41.08	78.62	22.089	5.9073	15.004	36.506	0.8723	0.0753
CD	156.52	61.939	86.111	17.117	1.6857	14.554	22.623	0.8889	0.302
CC	78.276	17.473	33.564	29.107	5.4788	20.418	45.413	0.2826	-0.6395
CQ	129.32	19.355	68.794	30.175	8.7901	17.479	52.133	0.936	0.8167
CE	142.19	17.625	91.472	13.971	2.0393	8.4185	18.829	0.9779	-0.7069
CG	134.25	19.825	94.572	12.393	2.0492	7.9043	18.557	0.9136	-0.3108
CH	109.96	22.565	58.7	35.781	5.2725	28.027	48.185	0.6776	0.591
CI	140.14	17.139	89.5	13.833	4.8227	7.9534	29.074	0.9504	-0.1544
CL	137.25	17.045	89.439	9.7734	1.3947	5.7512	12.619	1.0768	-0.0196
CK	142.34	15.994	81.567	16.766	6.6386	7.8795	38.271	0.98	-0.3344
CM	126.99	20.53	52.117	42.774	7.0275	30.498	62.525	1.0068	0.4122
CF	124.54	54.006	76.172	22.267	3.1186	16.106	31.881	0.901	0.1836
CP	133.22	47.622	86.006	19.312	3.0688	12.738	28.57	0.839	-0.3568
CS	143.47	51.313	88.711	15.442	2.6865	11.613	23.878	0.971	0.3449
CT	149.7	55.11	86.226	18.402	1.6688	15.814	23.564	0.9627	0.6195
CW	86.077	8.4754	35.647	51.244	8.9291	32.827	89.911	0.573	-0.0728
CY	118.21	48.009	78.738	23.939	5.1461	16.382	38.754	0.8197	-0.599
CV	154.63	17.234	96.005	12.672	1.802	7.5337	16.906	0.9797	-0.6478
QA	161.99	86.637	113.85	13.239	2.8955	7.9711	18.903	1.0303	0.1802
QR	143.97	79.594	111.14	17.709	4.0476	11.663	27.468	0.9841	-0.1814
QN	159.12	59.725	103.56	23.348	7.2198	15.354	43.952	0.8984	0.2181
QD	153.87	80.684	111.2	17.732	1.9364	14.517	23.197	0.9053	0.4935
QC	111.85	14.192	41.257	60.691	11.332	36.261	96.368	0.5876	-0.0891
QQ	117.38	47.365	90.199	26.612	6.4358	15.384	38.769	0.7942	0.8017
QE	130.71	88.445	106.59	14.136	1.5329	10.805	18.602	0.9769	-0.4488
QG	160.85	90.499	116.45	14.399	2.3901	10.441	21.573	1.0391	-0.2676
QH	123.67	42.585	76.166	41.751	6.8309	31.976	58.078	0.7992	0.7576
QI	153.34	21.889	114.43	14.055	4.5873	7.0799	26.35	0.9597	-0.3089
QL	133.96	24.784	112.79	9.4331	1.1399	5.8047	12.737	1.0155	-0.2437
QK	136.32	81.883	102.82	17.224	6.2199	10.011	36.758	1.0055	-0.2389
QM	136.68	48.771	79.911	41.645	6.4263	30.467	60.057	0.9718	0.2266
QF	149.77	72.45	99.845	22.766	2.9823	17.613	31.295	0.9758	-0.0872
QP	138.17	87.5	104.22	20.677	2.9243	15.125	29.242	0.9079	-0.2833
QS	159.17	86.653	117.6	15.514	2.7139	12.119	23.623	0.9763	0.3583
QT	164.63	79.816	108.95	18.623	1.6224	15.804	23.769	0.9467	0.5909
QW	94.469	26.77	48.159	53.863	8.2079	34.954	80.474	0.6161	0.0742
QY	128.48	77.345	98.087	24.965	4.8134	18.413	40.235	0.8783	-0.5988
QV	171.23	93.31	120.97	13.002	1.952	9.3368	18.809	1.0204	-0.6604
EA	168.5	114	134.73	13.42	3.1779	8.0691	19.374	1.0574	0.2398
ER	153.4	107.71	123.6	16.729	4.0688	10.533	26.246	0.9231	-0.292
EN	167.39	45.918	117.73	24.218	8.9651	14.777	59.877	0.929	0.2137
ED	152.33	109.11	132.88	16.636	2.0157	14.203	24.752	0.8721	0.4326
EC	106.01	21.45	57.88	62.747	13.873	40.194	100.68	0.6063	0.168
EQ	147.29	63.879	110.34	29.331	9.0995	16.638	54.526	0.874	0.8401
EE	150.29	103.09	122.81	12.92	1.5219	10.027	17.162	0.9095	-0.6404
EG	157.85	107.31	137.28	14.124	2.3931	10.466	21.087	1.031	-0.2611
EH	142.1	57.591	84.766	43.687	7.2089	34.489	61.047	0.8203	0.7332
EI	155.42	83.45	134.41	13.751	4.8205	8.3136	30.915	0.9565	-0.2204
EL	153.46	101.03	128.07	9.4776	0.97662	6.7986	12.387	1.0272	-0.2801
EK	145.24	87.617	114.29	15.976	6.1905	9.4395	35.216	0.9413	-0.2609
EM	125.79	68.634	96.167	42.589	7.2931	30.403	69.726	0.9999	0.2561
EF	147.82	79.765	121.89	23.366	3.2224	17.579	32.378	0.9696	0.0085
EP	136.16	97.303	118.36	21.329	3.1395	14.106	30.942	0.9113	-0.1943
ES	161.1	100.77	135.94	15.999	3.2889	12.155	28.47	1.0203	0.361
ET	167.54	100.67	125.75	19.455	2.3519	16.242	25.819	0.9918	0.766
EW	114.3	34.558	67.843	57.868	8.5301	42.12	89.123	0.6581	-0.1751
EY	148.66	91.84	121.37	26.445	5.0305	19.167	39.872	0.8985	-0.5965
EV	161.62	111.82	139.68	12.951	1.8582	9.3051	17.582	0.9987	-0.652
GA	158.71	101.66	129.56	12.859	2.6092	7.8709	17.497	1.0065	0.2079
GR	159.74	106.05	129.84	18.121	4.1321	12.022	28.454	1.0195	-0.2762
GN	140.56	75.214	116.63	24.292	7.8389	16.461	55.106	0.9521	0.2509
GD	147.61	103.23	123.23	17.97	1.9105	15.383	25.41	0.9373	0.4923
GC	90.111	28.864	56.111	53.526	8.5693	31.985	73.988	0.5024	0.0412
GQ	156.76	71.866	110.37	31.798	9.1902	18.092	52.873	0.9523	0.8422
GE	162.09	112.86	131.52	15.35	1.8378	11.786	21.212	1.0775	-0.6352
GG	154.64	94.319	133.38	12.416	1.4866	9.4713	16.845	0.9098	-0.154
GH	129.53	66.86	98.105	42.062	5.7637	32.699	56.673	0.79	0.6947
GI	152.89	97.37	129.12	13.332	4.7091	8.3897	29.52	0.9466	-0.2193
GL	142.59	101.72	124.77	9.6908	1.0348	7.2296	13.301	1.0468	-0.3794
GK	156.07	97.424	123.73	18.324	6.2384	10.964	39.896	1.0653	-0.2696
GM	130.27	77.956	101.99	40.324	6.1003	31.277	60.969	0.952	0.2874
GF	137.65	92.55	121.65	21.965	2.9376	17.221	29.338	0.9151	-0.032
GP	141.13	82.575	117.56	21.224	3.0925	14.406	30.236	0.9231	-0.1474
GS	160.61	109.54	132.11	15.683	2.8981	12.173	26.194	0.9889	0.3289
GT	163.69	108.77	131.24	18.312	1.8433	15.463	24.53	0.939	0.6712
GW	97.207	43.674	75.894	55.869	7.6586	38.603	74.01	0.6381	0.0389
GY	140.45	83.227	120.91	25.688	5.0917	18.915	40.308	0.8906	-0.6026
GV	151.25	102.76	133.96	12.19	1.7065	8.778	17.13	0.938	-0.6836
HA	155.36	79.578	108.83	13.3	2.8334	7.9805	19.008	1.0611	0.1496
HR	149.03	72.395	107.13	17.509	4.0193	11.464	26.426	0.9714	-0.2015
HN	148.67	53.273	92.079	23.458	7.2617	15.68	46.28	0.9282	0.2699
HD	151.05	77.327	104.24	16.946	1.7537	14.292	22.472	0.8739	0.3366
HC	95.355	15.092	38.115	51.963	8.7127	30.803	73.417	0.4923	-0.0058
HQ	127.87	41.308	83.987	31.379	9.888	17.163	49.418	0.9179	0.8434
HE	153.82	84.798	107.23	13.972	1.6426	11.058	18.253	0.9803	-0.589
HG	152.47	79.369	109.78	13.125	2.1481	9.7721	20.226	0.9665	-0.31
HH	104.88	41.55	68.288	34.445	4.7589	25.996	45.265	0.6607	0.6834
HI	143.83	79.642	107.82	13.472	4.4417	8.4317	26.862	0.95	-0.2465
HL	136.57	79.478	106.77	9.4795	0.91485	7.3196	12.228	1.0242	-0.223
HK	155.81	76.683	103.28	17.796	6.5639	10.786	37.815	1.0314	-0.2499
HM	119.61	42.431	71.749	41.812	6.0875	29.819	57.789	0.9717	0.2808
HF	133.05	68.909	96.29	21.946	3.0187	16.138	31.266	0.9114	-0.0302
HP	141.74	76.923	96.769	20.579	3.0405	14.386	31.065	0.9001	-0.2296
HS	152.64	74.568	104.28	15.965	3.2961	11.897	27.961	1.0143	0.3516
HT	157.49	77.719	105.41	18.832	1.6936	16.081	23.345	0.9651	0.6881
HW	85.574	18.615	45.311	53.981	7.584	37.591	82.198	0.6128	-0.0564
HY	121	70.125	93.78	24.579	4.5588	17.947	37.86	0.8438	-0.5877
HV	155.73	85.113	110.99	12.63	1.9384	8.7749	17.893	0.9878	-0.7121
IA	160.94	106.31	130.91	13.112	2.8902	8.0503	18.706	1.0284	0.2156
IR	147.14	105.55	121.2	18.09	3.9749	12.757	28.117	1.0117	-0.2637
IN	153.01	72.309	120.95	22.247	5.6266	14.93	39.222	0.8781	0.2075
ID	145.88	106.35	122.97	17.246	1.3254	14.858	20.798	0.8904	0.4506
IC	128.08	27.081	59.172	62.474	12.121	36.525	90.475	0.6004	0.2713
IQ	137.25	67.64	108.11	29.472	8.0522	17.677	49.077	0.8784	0.8365
IE	140.4	99.518	116.49	14.576	1.6531	11.45	19.073	1.0401	-0.5551
IG	139.5	111.07	125.48	12.942	2.163	9.7073	19.789	0.9531	-0.216
IH	140.41	66.848	91.298	42.1	6.5488	33.357	58.47	0.8022	0.7155
II	155.77	82.417	129.66	13.323	3.6572	7.9303	23.295	0.9209	-0.2659
IL	161.19	106.43	135.38	9.4134	0.67154	7.7193	11.254	1.0178	-0.23
IK	137.13	92.508	116.37	17.072	5.2379	10.466	34.334	1.0165	-0.2606
IM	149.7	61.612	103.25	39.589	5.0977	31.037	52.46	0.945	0.3562
IF	150.5	92.069	127.5	22.047	2.978	16.792	29.953	0.9229	0.0879
IP	150.47	97.925	124	20.983	2.7101	15.407	29.439	0.8909	-0.1612
IS	165.89	102.12	136.8	15.081	2.6858	11.79	23.497	0.9625	0.3345
IT	172.25	101.08	134.46	18.219	1.6003	15.5	21.783	0.9384	0.7499
IW	100.56	40.156	67.168	59.889	8.1734	42.98	84.954	0.6713	0.1235
IY	153.62	82.278	119.63	26.675	5.1386	18.645	40.081	0.9115	-0.6225
IV	180.63	115.42	141.23	12.74	1.6573	9.3475	16.662	0.9703	-0.6271
LA	157.16	118.28	133.13	13.001	2.9614	7.7517	18.53	1.0158	0.1916
LR	147.19	106.89	130.85	17.888	4.0628	11.847	27.907	0.9975	-0.2146
LN	159.9	92.159	124.4	23.098	6.9413	15.373	46.31	0.9066	0.1931
LD	156.49	111.57	133.44	17.841	1.6376	15.286	23.738	0.9176	0.4287
LC	120.23	36.767	66.97	66.365	14.246	34.683	108.16	0.6251	0.3196
LQ	143.49	58.715	113.34	29.947	8.4654	16.671	47.135	0.891	0.8403
LE	134.41	103.28	117.77	14.946	1.5821	11.716	18.788	1.0359	-0.5288
LG	167.23	122.51	141.32	13.295	2.2574	9.7759	20.258	0.9781	-0.2323
LH	134.3	72.585	102.47	41.579	6.4887	32.922	57.667	0.7842	0.7418
LI	166.15	101.98	139.02	13.447	5.1342	8.1558	32.523	0.9469	-0.183
LL	161.85	119.19	134.48	9.0362	0.79878	6.7148	10.847	0.976	-0.1699
LK	146.27	84.566	119.75	17.948	6.3326	10.459	37.257	1.0348	-0.2286
LM	135.01	56.478	108.24	39.488	6.3015	30.15	63.885	0.9339	0.3101
LF	154.57	101.83	130.86	22.258	3.2869	16.625	32.117	0.9038	0.0024
LP	160.84	113.81	136.56	21.216	2.9917	14.182	29.515	0.9077	-0.1079
LS	167.65	121.61	142.49	14.965	2.9065	11.828	26.071	0.9577	0.2706
LT	179.23	112.42	140.16	18.559	1.8007	15.877	24.246	0.9407	0.6499
LW	114.54	51.926	74.892	57.499	9.2092	38.236	86.551	0.6356	0.1543
LY	158.62	105.4	129.21	26.028	5.5781	18.511	42.085	0.8886	-0.5905
LV	173.13	128.83	148.62	12.931	1.7014	9.268	17.131	0.9861	-0.6466
KA	161.4	102.95	127.86	13.382	3.0493	8.2647	19.17	1.062	0.2313
KR	148.31	104.36	125.32	17.464	3.9738	11.46	27.276	0.9669	-0.2923
KN	166.34	54.12	123.04	22.793	6.7827	14.554	49.213	0.9026	0.2836
KD	157.71	92.503	127.22	16.449	1.7448	14.135	22.337	0.8607	0.3829
KC	114.3	14.123	51.247	64.757	14.856	38.235	116.73	0.6322	0.0635
KQ	150.65	61.815	101.98	28.828	8.7432	17.76	50.417	0.857	0.845
KE	136.16	98.674	110.29	13.126	1.481	10.306	16.967	0.9122	-0.6945
KG	152.43	93.378	125.3	13.92	2.4051	10.214	21.26	1.0297	-0.2395
KH	136.92	49.182	77.994	43.567	7.7002	34.811	62.997	0.8377	0.7628
KI	162.04	91.676	131.68	13.723	3.9259	8.4242	26.137	0.9401	-0.2696
KL	153.02	98.297	125.28	9.5167	0.86576	7.2946	12.283	1.0282	-0.3924
KK	139.58	75.307	116.86	14.947	4.4022	9.6361	29.95	0.908	-0.2319
KM	119.76	53.991	91.647	39.479	5.8086	29.695	55.148	0.9469	0.306
KF	155.23	83.221	119.92	22.961	2.854	17.253	30.871	0.9487	0.0754
KP	152.53	87.693	116.32	21.97	3.1597	14.536	32.809	0.9461	-0.1251
KS	168.13	89.194	132.49	15.661	2.9486	12.121	26.696	0.9996	0.4112
KT	176.54	88.3	124.19	19.129	2.0737	15.773	24.167	0.9823	0.7807
KW	91.038	30.228	63.531	56.253	8.5082	43.709	87.866	0.624	-0.1026
KY	141.02	73.172	112.19	25.948	4.3005	18.901	35.664	0.8675	-0.6252
KV	173.25	108.3	135.44	13.007	1.8447	9.4806	17.499	0.9935	-0.6409
MA	147.35	82.148	107.46	12.875	2.5497	8.1958	18.156	1.0046	0.1757
MR	140.51	81.14	105.38	18.223	3.8548	12.17	28.151	1.0223	-0.2508
MN	147.06	48.888	99.104	23.472	6.0171	16.37	43.851	0.9253	0.2181
MD	147.97	74.552	108.6	17.777	1.4155	15.236	22.625	0.9277	0.3995
MC	106.28	9.6203	36.61	62.203	11.675	37.869	98.963	0.5963	0.1395
MQ	127.42	46.018	86.279	29.4	7.8855	18.031	47.729	0.8885	0.812
ME	126.04	83.433	105.4	15.037	1.5978	11.77	19.007	1.0612	-0.5647
MG	139.33	80.094	111.5	13.003	2.0627	9.4488	18.994	0.9513	-0.1324
MH	126.02	43.062	66.517	41.738	5.8633	33.579	59.993	0.8012	0.6265
MI	148.89	70.783	110.89	13.665	3.8875	8.1481	24.333	0.941	-0.2873
ML	141.82	22.822	109.65	9.4274	0.913	6.335	11.681	1.0242	-0.3505
MK	125.84	71.447	102.45	18.136	5.4973	11.307	35.284	1.075	-0.2475
MM	120.96	44.728	80.124	35.36	4.5991	29.521	51.94	0.8391	0.4535
MF	146.83	67.96	99.642	21.887	2.7357	17.205	31.691	0.9054	-0.0002
MP	128.63	83.065	102.99	20.807	2.5313	14.943	28.865	0.894	-0.1645
MS	152.65	90.057	111.82	15.272	2.7697	12.319	24.98	0.988	0.3276
MT	157.61	81.836	109.7	18.478	1.4604	16.165	22.263	0.9476	0.6557
MW	81.655	24.258	47.806	56.485	7.4653	36.687	80.521	0.6312	0.0549
MY	134.82	63.46	93.695	26.087	4.8962	18.406	39.104	0.9061	-0.6536
MV	154.34	80.295	117.23	12.739	1.6807	8.8186	17.112	0.9693	-0.6174
FA	160.63	94.96	124.06	13.381	2.9604	8.0755	18.839	1.0494	0.1884
FR	143.86	92.728	116.06	18.433	4.0078	12.265	27.819	1.027	-0.2221
FN	158.91	69.002	113.72	22.565	6.31	15.475	45.804	0.899	0.2354
FD	145.86	90.449	115.88	17.835	1.5455	15.015	23.599	0.9186	0.4814
FC	103.38	19.148	47.406	61.921	14.369	33.53	105.62	0.5875	0.0927
FQ	141.63	54.799	103.39	30.501	8.9443	17.64	50.921	0.9292	0.845
FE	139.88	98.589	114.07	15.456	1.6038	12.177	19.227	1.1042	-0.511
FG	137.48	95.8	122.15	12.759	2.0685	9.4664	19.039	0.944	-0.1952
FH	128.95	54.766	82.668	40.836	6.1674	32.655	57.64	0.7665	0.6984
FI	162.62	85.689	127.81	13.58	4.5541	8.3885	30.254	0.9462	-0.1835
FL	148.35	85.316	127.29	9.2066	0.76961	6.9522	11.344	0.9983	-0.2826
FK	146.99	63.792	110.94	17.925	5.9854	10.755	35.06	1.0558	-0.2221
FM	141.57	36.956	90.116	39.599	6.3615	30.791	65.106	0.9371	0.3482
FF	141.71	86.305	115.12	20.552	2.7217	14.924	27.543	0.8446	0.0486
FP	141.2	92.692	116.57	20.414	2.8269	14.026	29.268	0.8775	-0.154
FS	152.68	99.553	124.88	14.883	2.7291	11.455	24.853	0.9535	0.2891
FT	171.26	87.914	123.39	18.555	1.7834	15.923	23.817	0.9437	0.69
FW	96.551	41.706	67.635	52.147	7.2156	39.156	69.311	0.5901	0.0939
FY	143.14	87.317	115.24	24.792	4.6604	18	37.509	0.8376	-0.5833
FV	177.61	108.46	130.54	12.886	1.6698	9.1956	16.745	0.9749	-0.6597
PA	160.52	102.95	127.31	13.179	2.9609	7.8641	18.327	1.0401	0.2549
PR	154.75	88.86	121.07	18.135	4.272	11.47	28.317	1.0243	-0.2188
PN	172.54	49.45	97.316	23.468	7.2317	15.887	46.673	0.9214	0.174
PD	174.7	88.662	117.88	17.895	1.9028	15.187	24.373	0.927	0.4258
PC	101.76	15.041	50.27	53.972	8.5647	32.43	74.942	0.5153	-0.0312
PQ	149.74	62.868	100.29	31.552	9.2379	16.946	55.26	0.9303	0.8252
PE	144.2	105.86	120.58	15.203	1.8388	11.523	19.925	1.0591	-0.551
PG	145.31	92.292	118.88	12.851	2.0637	9.7327	19.913	0.9492	-0.3091
PH	120.28	51.691	72.062	40.21	5.4915	31.816	54.68	0.7517	0.6757
PI	146.41	83.186	121.68	13.466	5.158	8.6456	31.126	0.9534	-0.2318
PL	141.37	78.653	120.38	9.6097	1.1002	7.2191	13.743	1.049	-0.2768
PK	139.11	79.775	116.07	18.349	6.7196	10.348	39.446	1.0485	-0.2564
PM	138.37	57.089	88.546	42.097	7.166	31.426	70.1	0.9721	0.3365
PF	135.55	83.775	108.94	21.859	3.3065	16.481	30.748	0.9052	-0.0496
PP	126.37	62.553	107.14	20.29	3.2952	13.929	28.665	0.8848	-0.1187
PS	151.63	95.215	122.01	15.87	2.9918	11.677	26.606	1.0058	0.3817
PT	158.14	84.609	115.34	18.57	1.8207	15.507	24.027	0.9417	0.6959
PW	98.182	22.074	61.518	54.685	8.9603	37.431	79.495	0.637	0.1155
PY	123.54	85.668	108.95	25.348	5.4165	17.63	40.263	0.8687	-0.5962
PV	150.93	105.93	130.5	12.511	1.8469	9.047	17.207	0.9648	-0.6845
SA	163.68	109.22	132.24	13.108	2.9964	7.8812	18.566	1.0359	0.1993
SR	163.59	104.51	128.9	18.122	4.3152	12.507	29.25	1.0309	-0.2066
SN	169.89	67.754	122.73	22.794	6.9791	15.052	47.5	0.8982	0.256
SD	169.54	91.031	124.95	17.793	1.8904	14.82	24.527	0.9282	0.499
SC	106.47	26.257	59.877	55.047	8.938	32.832	90.943	0.5064	0.0329
SQ	166.83	67.804	112.59	29.585	9.336	17.467	51.599	0.91	0.8467
SE	153.19	105.78	124.74	15.526	1.7299	11.659	19.72	1.0776	-0.4898
SG	149.35	108.37	128.98	13.206	2.1521	9.784	20.5	0.9759	-0.2344
SH	151.04	63.57	90.094	42.778	6.7734	34.042	61.687	0.8138	0.7329
SI	156.48	94.315	129.43	13.503	4.5585	8.12	26.901	0.941	-0.263
SL	148.8	89.818	125.19	9.3731	1.0142	7.5024	13.263	1.0254	-0.428
SK	155.72	97.41	123.1	18.124	5.9663	10.86	36.838	1.0556	-0.2149
SM	141.97	67.044	99.722	40.834	5.4239	31.108	55.822	0.9533	0.3761
SF	141.57	97.872	114.26	21.791	3.1584	16.172	30.041	0.8937	-0.0927
SP	148.56	105	124.08	21.112	3.1814	14.483	31.043	0.9116	-0.0967
SS	160.98	104.27	128.46	14.457	2.7657	11.035	24.717	0.9306	0.3357
ST	171.68	104.65	131.75	18.352	1.7926	14.831	22.055	0.9377	0.725
SW	116.82	38.47	70.412	57.086	9.8684	38.528	80.835	0.6411	-0.0365
SY	151.67	91.111	122.95	26.471	5.2477	18.196	37.929	0.879	-0.6193
SV	171.78	116.47	135.99	12.625	1.9104	8.9649	18.078	0.9739	-0.6519
TA	162.25	107.95	129.53	13.044	2.8336	7.9826	18.035	1.0199	0.2458
TR	168.89	99.154	125.32	18.697	4.2273	12.193	28.757	1.048	-0.2105
TN	149.46	68.842	112.56	22.726	6.0189	15.064	39.971	0.8901	0.2225
TD	162.26	98.243	126.91	17.575	1.8201	14.494	22.545	0.9108	0.5725
TC	119.15	25.091	55.198	58.143	8.9737	33.531	88.777	0.5252	0.0022
TQ	168.34	66.821	107.86	30.274	8.3155	17.341	48.408	0.8991	0.8399
TE	152.84	108.17	125.24	15.413	1.6861	11.799	19.524	1.0761	-0.4341
TG	140.93	93.768	120.25	12.794	2.1023	9.4769	19.553	0.9429	-0.222
TH	129.14	62.385	86.876	42.056	5.582	33.983	57.788	0.7929	0.6584
TI	170.99	96.501	126.75	13.501	4.2675	8.0638	25.332	0.941	-0.2825
TL	144.59	98.345	128.28	9.7324	0.88358	7.8508	13.02	1.0678	-0.2933
TK	146.16	90.571	119.33	17.712	5.9154	10.493	35.576	1.0532	-0.218
TM	134.2	61.162	91.909	41.633	6.0195	31.752	60.448	0.9653	0.3912
TF	154.68	85.857	116.39	22.324	2.9257	17.092	30.585	0.925	-0.0861
TP	137.61	101.82	117.99	20.451	2.7237	14.273	27.848	0.8745	-0.186
TS	151.35	96.262	127.64	15.247	2.8067	11.518	24.937	0.9656	0.362
TT	155.46	94.674	123.11	17.693	1.6618	14.159	22.293	0.9038	0.7171
TW	102.66	29.218	63.178	58.675	9.4187	41.821	92.299	0.6524	-0.036
TY	149.13	86.346	114.42	26.474	5.2515	18.299	41.258	0.8913	-0.6457
TV	172.9	98.956	133.18	12.595	1.754	9.013	17.22	0.964	-0.635
WA	140.8	70.948	98.34	12.931	2.934	7.437	19.527	1.0261	0.1854
WR	135.77	54.766	91.636	17.692	4.0138	12.015	27.441	1.0015	-0.2567
WN	141.89	53.348	78.981	22.392	6.5856	15.155	43.462	0.8974	0.1697
WD	121.7	58.886	91.539	17.83	1.5215	14.072	23.268	0.9233	0.3774
WC	88.479	7.9029	27.805	62.643	13.897	27.234	101.51	0.5964	0.2406
WQ	118.37	33.017	67.798	31.149	8.2357	16.907	48.974	0.9109	0.8436
WE	131.38	72.716	90.578	15.509	1.7213	12.433	19.613	1.0831	-0.5873
WG	129.47	70.511	99.072	12.82	1.9071	9.1855	19.082	0.9257	-0.2729
WH	104.85	22.971	57.538	38.666	4.9575	31.47	52.5	0.7273	0.6429
WI	138.58	68.376	94.727	14.132	5.2469	9.026	33.827	0.9983	-0.1801
WL	144.35	20.643	97.52	9.3177	1.0253	6.9394	11.729	1.0167	-0.2445
WK	123.28	61.061	88.558	18.535	6.5787	10.699	37.471	1.0758	-0.2396
WM	111.31	30.675	57.738	41.127	7.0585	30.968	70.255	0.9777	0.1464
WF	130.67	68.89	87.239	20.475	2.9841	14.95	28.109	0.8505	0.0743
WP	121.88	61.151	90.212	19.075	2.5302	13.301	26.317	0.8243	-0.2653
WS	136.57	75.016	95.214	15.357	2.7214	12.246	25.398	0.9703	0.3528
WT	149.69	67.019	92.825	18.397	1.7313	15.707	23.392	0.951	0.6578
WW	89.159	24.279	50.099	42.899	5.3261	29.871	55.168	0.4945	-0.3074
WY	113.82	64.371	86.254	23.438	4.928	16.873	38.841	0.819	-0.5846
WV	146.43	66.275	97.647	12.969	1.633	9.0688	17.322	0.9993	-0.6839
YA	160.92	101.1	123.99	13.621	2.9517	8.2487	19.241	1.0659	0.1819
YR	142.27	85.39	112.51	18.283	3.9769	12.124	28.08	1.0092	-0.2044
YN	143.85	74.385	110.83	22.085	6.0052	14.335	42.599	0.8718	0.2361
YD	145.56	93.22	120.16	17.029	1.6103	14.608	22.777	0.8771	0.5217
YC	101.57	19.867	47.347	58.326	11.321	34.837	93.901	0.5643	0.0921
YQ	149.56	50.371	93.665	30.227	8.5968	17.534	48.617	0.9087	0.8522
YE	144.16	95.899	115.14	15.094	1.663	11.181	18.652	1.0595	-0.5038
YG	140.37	97.6	121.24	13.05	2.0566	9.6991	19.169	0.9603	-0.2091
YH	119.56	54.433	78.519	40.995	6.3406	32.465	52.615	0.7693	0.71
YI	159.25	85.606	122.62	13.769	4.3441	8.3103	28.68	0.9569	-0.2252
YL	155.5	96.603	121.43	9.5121	0.81508	7.2947	11.774	1.0219	-0.3111
YK	145.51	74.838	110.82	17.609	5.5678	10.17	34.572	1.0331	-0.2129
YM	135.85	40.151	77.257	42.696	6.5741	31.888	65.176	1.0052	0.305
YF	140.75	88.577	113.08	21.178	2.6394	15.921	29.128	0.8851	0.0774
YP	134.02	85.279	115.18	20.691	2.8618	14.244	29.626	0.8903	-0.1891
YS	153.87	98.286	122.93	15.2	2.7825	12.162	24.841	0.9657	0.3374
YT	166.53	103.9	121.79	18.488	1.7565	15.973	23.542	0.9461	0.6563
YW	90.369	36.435	64.768	53.205	7.0733	37.676	73.753	0.6042	-0.0006
YY	135.2	78.294	111.18	23.764	4.1423	17.783	34.442	0.8257	-0.5905
YV	161.87	94.227	127.11	13.005	1.7447	9.4417	17.108	0.9991	-0.6806
VA	162.11	107.64	134.82	12.638	2.7616	7.9811	17.738	1.0138	0.2467
VR	167.44	98.111	131.1	18.002	4.0908	11.902	28.428	1	-0.275
VN	155.95	90.425	120.77	23.017	6.8771	15.415	47.628	0.9115	0.1854
VD	156.16	111.85	127.42	17.028	1.5967	14.527	23.068	0.8927	0.3818
VC	117.35	23.154	61.937	59.193	11.653	35.881	101.58	0.5619	0.2004
VQ	161.16	76.15	109.32	30.457	8.7428	17.661	50.602	0.9052	0.8462
VE	149.84	105.42	122.86	14.66	1.675	11.269	18.883	1.0282	-0.6213
VG	139.67	94.808	122.39	12.534	1.9238	9.3539	18.38	0.9194	-0.2464
VH	131.04	71.72	93.054	41.376	5.8705	34.882	55.017	0.797	0.7276
VI	175.15	112.36	137.85	13.455	4.6399	8.4141	29.795	0.9485	-0.1936
VL	154.15	107.04	135.04	9.5768	0.85132	7.3188	12.003	1.0364	-0.2538
VK	143.01	96.378	122	17.76	6.0517	10.563	38.107	1.0305	-0.2644
VM	140.62	67.422	102.36	40.556	6.4881	31.477	60.375	0.9637	0.3724
VF	157.91	88.137	127.84	22.501	3.1461	17.318	31.714	0.9358	0.0301
VP	152.35	97.454	125.43	20.478	2.7106	14.042	28.239	0.8786	-0.189
VS	172.64	110.84	141.48	15.306	2.9862	12.038	26.537	0.9748	0.3238
VT	173.11	71.497	133.7	18.542	1.9778	15.793	24.035	0.946	0.7138
VW	103.9	42.514	73.147	59.804	8.4201	39.692	77.292	0.6832	0.0919
VY	151.37	98.188	120.82	26.422	5.4195	18.973	40.899	0.9107	-0.6189
VV	164.75	114.54	142.2	12.338	1.5372	8.8952	15.998	0.9363	-0.665
